# Supplementary material for: Electrospun α-Terthienyl Nanofibres as a Sustainable Alternative to ChemicalNematicides: Controlled Release, Eco-Safety, and Enhanced Plant Protection
Source: Research Square preprint supplement (doi:10.21203/rs.3.rs-7789603/v1), 2025-11-06
Supplement: Supplementary file 1 [file 659e69d085dd953deb220725.docx]

**Table1. *In vitro* study of α-terthienyl-infused nanofibre on egg hatching**

| **Treatment** | **24hr** | **Decrease over control** | 48hrs | **Decrease over control** | 72hrs | **Decrease over control** |
| --- | --- | --- | --- | --- | --- | --- |
| **T3ppm** | 6b  (0.7611) | 56.07% | 8.33b  (0.9178) | 63.78% | 11.66b  (1.0572) | 59.31% |
| **5ppm** | 5c  (0.6930) | 63.39% | 7.33c  (0.8644) | 68.13% | 7.66c  (0.8837) | 73.27% |
| **10ppm** | 5.33bc  (0.7001) | 60.9% | 5d  (0.6930) | 78.26% | 6.66d  (0.8197) | 76.76% |
| **15ppm** | 2.33d  (0.3597) | 79.43% | 3.66e  (0.5604) | 76.12% | 4.33e  (0.6343) | 70.5% |
| **Control** | 11.33 a  (1.0472) |  | 15.33a  (1.1728) |  | 22.6a  (1.3518) |  |
| **SEd** | 0.300 |  | 0.237 |  | 0.225 |  |
| **CD** | 0.678 |  | 0.534 |  | 0.508 |  |

(Figures in parentheses are arc sine transformed values.The columns followed by alphabets are significantly differ from each other at1% level by DMRT)

**Table2. *In vitro* study of α-terthienyl-infused nanofibre on Juvenile mortality**

| **Treatment** | **24hr** | **48hrs** | **72hrs** |
| --- | --- | --- | --- |
| **3ppm** | 19.667d  (1.287) | 24.667c  (1.3661) | 40.333d  (1.608) |
| **5ppm** | 36.333b  (1.559) | 45.00b  (1.648) | 49.00c  (1.648) |
| **10ppm** | 37.333a  (1.5705) | 50.66a  (1.7044) | 81.667a  (1.9109) |
| **15ppm** | 33.66c  (1.522) | 45.66b  (1.6574) | 80.66b  (1.9065) |
| **Control** | 0.000e  (0.000) | 0.000d  (0.000) | 0.000e  (0.000) |
| SEd | 0.287 | 0.447 | 0.321 |
| CD | 0.649 | 1.010 | 0.724 |

(Figures in parentheses are arc sine transformed values.The columns followed by alphabets are significantly differ from each other at1% level by DMRT)

**Table 3. Soil degradation of α-terthienyl-infused nanofibre**

| **Time interval** | **Initial weight** | **Final weight** | **Degradation (%)** |
| --- | --- | --- | --- |
| **T1 30 days** | 0.87 | 0.54 | 37.93% |
| **T2 45 days** | 0.46 | 47.1% |
| **T3 60 days** | 0.38 | 56.32% |
| **T4 90 days** | 0.32 | 63.21% |
| **T5 120 days** | 0.19 | 78.1% |
|  |  |  |  |

**Table 4. Effect of α-terthienyl infused nanofibres on weight of earthworm**

| **Treatment** | **0 days** | **5days** | **10days** | **15 days** | **20 days** | **25 days** | **30 days** |
| --- | --- | --- | --- | --- | --- | --- | --- |
| **10 ppm  Alpha terthienyl  infused nanofibre** | 7.5 | 6.32 | 7.3 | 7.8 | 8.2 | 8.9 | 9 |
| **Untreated** | 7.1 | 6.15 | 6.82 | 7.3 | 7.9 | 8.4 | 8.6 |
| **Calculated t value** | 0.217899881 | 0.252923 | 0.187616 | 0.16885 | 0.143932 | 0.028272 | 0.029 |
| **Table t value** | 1.943 | 1.943 | 1.943 | 1.943 | 1.943 | 1.943 | 1.943 |

(Figures in parentheses are Paired T test value)

**Table 5. Biosafety of α-terthienyl infused nanofibre on number of African earthworm
 *E. euginea* present in soil**

| **Treatment** | **Total worms released** | **5days** | **10days** | **15 days** | **20 days** | **25 days** | **30 days** |
| --- | --- | --- | --- | --- | --- | --- | --- |
| **10 ppm Alpha terthienyl infused nanofibre** | 10 | 9.38 | 9.12 | 9.39 | 10.38 | 11.44 | 38.91 |
| **Untreated** | 10 | 8.29 | 8.14 | 10.22 | 9.49 | 10.29 | 47.51 |
| **Calculated t value** |  | 0.457024 | 0.448275 | 0.440296 | 0.447772 | 0.443426 | 0.161355 |
| **Table t value** |  | 1.846 | 1.846 | 1.822 | 1.822 | 1.804 | 1.69 |

(Figures in parentheses are Paired T test value)

**Table 6. Interpretation of Molecular docking results of Nematode proteins against α-terthienyl**

| **S.No** | **Pubchem**  **ID** | **Ligand** | **Protein target** | **Uniprot ID** | **Binding affinity** | **Interaction type** | **Number of H-bonds** | **Vander Waals** |
| --- | --- | --- | --- | --- | --- | --- | --- | --- |
| 1 | 65067 | Alpha -Terthienyl | Cytochrome Oxidase  Sub unit -1 | A0A023VVD2 | -7.2 | Vander Waals,  Conventional  Hydrogen Bond,  Pi-Sigma,  Pi- Sulfur,  Pi-Pi  Stacked,  Pi-Pi-T shaped,  Pi -Alkyl | 1 HIS A:140 |  |
| 2 | 65067 | Alpha -Terthienyl | Clavata | Q6YKB1 | -4.4 | Vander Waals,  Conventional  Hydrogen Bond,  Pi -Alkyl | 1 VAL A: 3 | GLU A:2 |

**Table7. Assessment of Seed germination and Quality parameters of alpha-terthienyl
 encapsulated Bhendi seeds**

| **Treatment** | **Germination %** | **Seedling length(cm)** | **Vigour index (%)** |
| --- | --- | --- | --- |
| **T1 -Encapsulated seed @ 10 ppm** | 78% | 18 cm | 1404.6 |
| **T2 -Non encapsulated seed** | 75% | 14 cm | 1050 |
| **Mean** | 76.5 | 16 | 2454.6 |
| **Standard error deviation** | 2.12 | 2.38 | 250.71 |
| **CD** | 5.89 | 7.85 | 695.88 |

**Table 8. Evaluation of plant growth parameters of α-terthienyl encapsulated nanofibre coated Bhendi seeds under pot culture**

**conditions.**

| **Treatment** | **Shoot length** | **Shoot weight** | **Root length** | **Root weight** |
| --- | --- | --- | --- | --- |
| T1-Alpha –terthienyl encapsulated Bhendi seed 10 ppm @30DAI | 37.75d  (1.5718) | 33.6e  (1.5262) | 21.833d  (1.3377) | 18.5e  (1.2631) |
| T2-Alpha –terthienyl encapsulated Bhendi seed 10 ppm @45DAI | 43.5c  (1.6373) | 39.7d  (1.5986) | 23.33c  (1.3678) | 20.3d  (1.3051) |
| T3-Alpha –terthienyl encapsulated Bhendi seed 10 ppm @60DAI | 55.66b  (1.7452) | 45.5c  (1.6578) | 21.66de  (1.3334) | 20.96c  (1.3198) |
| T4-Alpha –terthienyl encapsulated Bhendi seed 10 ppm @90DAI | 57.33b  (1.7579) | 54.5b  (1.7363) | 20f  (1.2981) | 23b  (1.3608) |
| T5-Alpha –terthienyl encapsulated Bhendi seed 10 ppm @120DAI | 68.33a  (1.8345) | 61.83a  (1.7911) | 26.166a  (1.4174) | 25a  (1.3974) |
| T6- Non-encapsulated Bhendi seed treated with Carbofuran 3G@1g/ plant @ 120 DAI | 36.16de  (1.5578) | 28.5f  (1.4545) | 24.66b  (1.3915) | 21.16c  (1.3252) |
| T7- Non-encapsulated Bhendi@ 120 DAI | 31.16e  (1.4928) | 23.46g  (1.3682) | 21.33e  (1.3280) | 17.566e  (1.2407) |
| SEd | 2.093 | 1.229 | 1.618 | 1.885 |
| CD | 4.533 | 2.662 | 3.505 | 4.081 |

(Figures in parentheses are arc sine transformed values.The columns followed by alphabets are significantly differ from each other at1% level by DMRT)

**Table 9. Evaluation of release kinetics and suppressive actions of root knot nematode *M. incognita* population in alpha-terthienyl encapsulated nanofibre seed coated Bhendi under pot culture conditions**

| **Treatment** | **Soil population No.of Juveniles /200 cc of soil** | **Adult female /5 g of roots** | **No.of egg mass / 5g of roots** | **No.of gall / 5g of roots** |
| --- | --- | --- | --- | --- |
| T1-Alpha –terthienyl encapsulated Bhendi seed 10 ppm @30DAI | 340b  (2.531) | 13.37b  (1.1260) | 15.73b  (1.1968) | 14.66b  (1.1663) |
| T2-Alpha –terthienyl encapsulated Bhendi seed 10 ppm @45DAI | 312c  (2.4941) | 8.66c  (0.9378) | 15.33c  (1.1856) | 12.33c  (1.0910) |
| T3-Alpha –terthienyl encapsulated Bhendi seed 10 ppm @60DAI | 256d  (2.4082) | 6.337d  (0.8018) | 14.99d  (1.1760) | 11.5d  (1.0606) |
| T4-Alpha –terthienyl encapsulated Bhendi seed 10 ppm @90DAI | 219e  (2.3404) | 6e  (0.7781) | 12.46e  (1.0957) | 9.9e  (0.9956) |
| T5-Alpha –terthienyl encapsulated Bhendi seed 10 ppm @120DAI | 154f  (2.1875) | 4.31f  (0.6333) | 11.46f  (1.0594) | 3.14f  (0.4959) |
| T6-Non-encapsulated Bhendi seed treated with Carbofuran 3G@1g/ plant @ 120 DAI | 112g  (2.0492) | 3.33g  (0.5228) | 11.2g  (1.0492) | 2.33g  (0.36145) |
| T7 -Non-encapsulated Bhendi seed (Control) @ 120 DAI | 1326a  (3.12254) | 28.33a  (1.4522) | 17.1a  (1.2329) | 31a  (1.49135) |
| SEd | 2.410 | 0.110 | 0.104 | 0.111 |
| CD(0.01)% | 5.220 | 0.239 | 0.225 | 0.241 |

(Figures in parentheses are arc sine transformed values.The columns followed by alphabets are significantly differ from each other at1% level by DMRT)
